# Supplementary material for: Highly contrastive, real-time modulation of light intensity by reversible stress-whitening of spontaneously formed nanocomposites: application to wearable strain sensors
Source: Royal Society of Chemistry journal article supplement (doi:10.1039/d1tc00256b), 2021-01-01
Supplement: d1tc00256b1.pdf [file d1tc00256b1.pdf]

## Supporting Information

### Highly contrastive, real-time modulation of light intensity by reversible stress-whitening of spontaneously formed nanocomposites: Application to wearable strain sensors

Seung Koo Park,<sup>\*a</sup> Sungryul Yun,<sup>a</sup> Geonwoo Hwang,<sup>b</sup> Meejeong Choi,<sup>a</sup> Dong Wook Kim,<sup>c</sup> Jong-Moo Lee,<sup>d</sup> Bong Je Park,<sup>a</sup> Saekwang Nam,<sup>a,e</sup> Heeju Mun,<sup>b</sup> Seongcheol Mun,<sup>a</sup> Jeong Mook Lim,<sup>a</sup> Eun Jin Shin,<sup>a</sup> Ki-Uk Kyung<sup>\*b</sup> and Suntak Park<sup>\*a</sup>

<sup>a</sup>Human Enhancement & Assistive Technology Research Section, Artificial Intelligence Research Laboratory, Electronics and Telecommunications Research Institute, 218 Gajeong-ro, Yuseong-gu, Daejeon 34129, South Korea.

<sup>b</sup>Department of Mechanical Engineering, Korea Advanced Institute of Science and Technology, 291 Daehak-ro, Yuseong-gu, Daejeon 34141, South Korea.

<sup>c</sup>Advanced Materials Division, Korea Research Institute of Chemical Technology, 141 Gajeong-ro, Yuseong-gu, Daejeon 34114, South Korea.

<sup>d</sup>Quantum Optics Research Section, Electronics and Telecommunications Research Institute, 218 Gajeong-ro, Yuseong-gu, Daejeon 34129, South Korea.

<sup>e</sup>Haptic Intelligence Department, Max Planck Institute for Intelligent Systems, Heisenbergstr. 3, 70569 Stuttgart, Germany.

\*Corresponding authors: S. K. Park (skpark@etri.re.kr); K.-U. Kyung (kyungku@kaist.ac.kr); S. Park (spark@etri.re.kr)

## Experimental

### Materials

Diethoxydimethylsilane, diethoxymethylvinylsilane, and diethoxymethylsilane were acquired from Tokyo Chemical Industry Co., Ltd. *tert*-Butyl acrylate (*t*BA), 37 % hydrochloric acid (HCl), platinum (0)-1,3-divinyl-1,1,3,3,-tetramethyldisiloxane complex solution containing 0.05 mol% of platinum, 2,2-dimethoxy-2-phenylacetophenone, and chloroform-*d*<sub>1</sub> were purchased from Aldrich Chemical Co., Inc. Magnesium sulfate and ethyl acetate (EA) were acquired from Junsei Chemical Co., Ltd.

### Synthesis of poly(dimethylsiloxane-co-methylsiloxane) (PDMMS)

50.1 g of diethoxydimethylsilane, 5.0 g of diethoxymethylsilane, 5.7 mL of distilled water, and 1.5 mL of 37 % HCl were used. The feeding mole ratio of diethoxydimethylsilane to diethoxymethylsilane is 0.90 to 0.10. The detailed polymerization and purification methods can be found in our previous report. Yield: 22.3 g (82 %).  $M_n=6.0\times 10^3$  g/mol.  $M_w=18.4\times 10^3$  g/mol. n:o (mole ratio)=0.900:0.100. IR  $\nu_{\max}$  (cm<sup>-1</sup>): 2963s, 2905m (C-H str., methyl); 2156m (Si-H str.); 1412m (C-H ben., methyl); 1093s, 1023s (Si-O-Si str.). <sup>1</sup>H NMR  $\delta_h$  (ppm): 4.63 (Si-H, d); 5.85-5.78 (-CH=, m); 0.05 (-CH<sub>3</sub>, m). <sup>13</sup>C NMR  $\delta_c$  (ppm): 1.14 (-CH<sub>3</sub>).

### *Fabrication of a poly(tert-butyl acrylate) (PtBA) film for initial modulus and refractive index measurement*

After 0.5 mol% of 2, 2-dimethoxy-2-phenylacetophenone was completely dissolved in *t*BA, the solution was filtered with a 1.0  $\mu\text{m}$  Teflon filter. The PtBA film was fabricated in the same way as the stress-whitening films were. The solution was also spin-coated on the hypotenuse surface of a high-index right-angle prism (N-SF11 glass,  $n=1.7778$ ). The layer on the prism was UV-cured and dried in the same way as the PtBA film was.

### *Fabrication of a PDMS film for initial modulus and refractive index measurements*

First, 0.0030 g of platinum (0)-1,3-divinyl-1,1,3,3-tetramethyldisiloxane complex solution and 0.8078 g of P06 were completely mixed together. 0.028 g of PDMMS was added to 0.229 g of the P06 containing the platinum catalyst and was completely mixed with the P06. The polymer mixture was casted on a glass plate and the high-index right-angle prism by Doctor-knife. The polymer layers were annealed at 70  $^{\circ}\text{C}$  under vacuum for 2 h, followed by removal of air bubbles from the layers at room temperature for 1 h under vacuum.

### *Calculation of solubility parameter ( $\delta$ ) of *t*BA and $\Delta\delta$ between *t*BA and PDMS by method Hoftyzer-Van Krevelen*

The solution parameter components ( $\delta_d$ ,  $\delta_p$ ,  $\delta_h$ ) of a given material can be calculated from its

$$\delta_d = \frac{\sum F_{di}}{V}, \delta_p = \frac{\sqrt{\sum F_{2pi}}}{V}, \delta_h = \frac{\sqrt{\sum E_{hi}}}{V},$$

group contributions using the following equations:

where  $\delta_d$ ,  $\delta_p$ , and  $\delta_h$  are a solubility parameter contributed by dispersion, polar, and hydrogen bonding components, respectively.  $F_{di}$  and  $F_{pi}$  are a molar attraction constant contributed by dispersion and polar components, respectively.  $E_{hi}$  is hydrogen bonding energy.  $V$  is a molar volume. The solubility parameter of a given material can be calculated using the following equation:  $\delta = \sqrt{\delta_d^2 + \delta_p^2 + \delta_h^2}$ . The solubility of a polymer in a solvent can be estimated using the following equation:  $\Delta\delta = \sqrt{(\delta_{d,p} - \delta_{d,s})^2 + (\delta_{p,p} - \delta_{p,s})^2 + (\delta_{h,p} - \delta_{h,s})^2}$ , where  $\delta_{d,p}$ ,  $\delta_{p,p}$ ,  $\delta_{h,p}$  and  $\delta_{d,s}$ ,  $\delta_{p,s}$ ,  $\delta_{h,s}$  are  $\delta_d$ ,  $\delta_p$ , and  $\delta_h$  of a polymer and solvent, respectively.  $\Delta\delta$  means a 3D distance of solubility parameter between the polymer and solvent in a solubility sphere. The  $\delta$ ,  $\delta_d$ ,  $\delta_p$ , and  $\delta_h$  values for *t*BA were calculated as shown in table S1. The values for PDMS and  $\Delta\delta$  between PDMS and *t*BA were shown in table S2. The unit for  $\delta$  are expressed as the square root of a cohesive energy density ( $\text{J}^{1/2}\cdot\text{cm}^{-3/2}$ ) which is associated with intermolecular attractive interactions or as the square root of a pressure ( $\text{MPa}^{1/2}$ ).

### **Schemes**

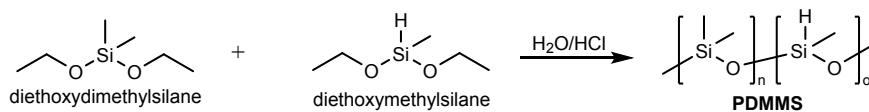

**Scheme S1** Synthesis of poly(dimethylsiloxane-*co*-methylsiloxane) (PDMMS).

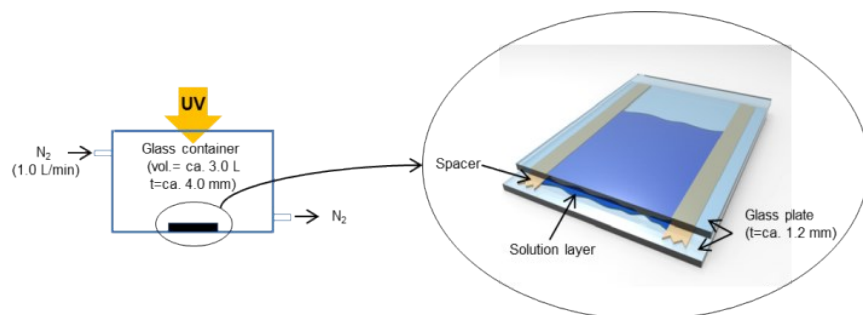

**Scheme S2** A schematic diagram of UV-cure equipment.

## Figures

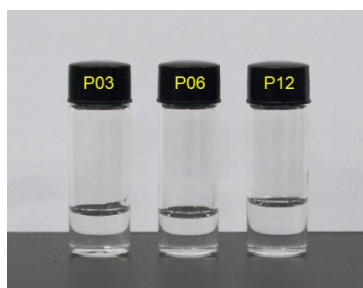

**Fig. S1** A Photograph of PDMVS copolymers.

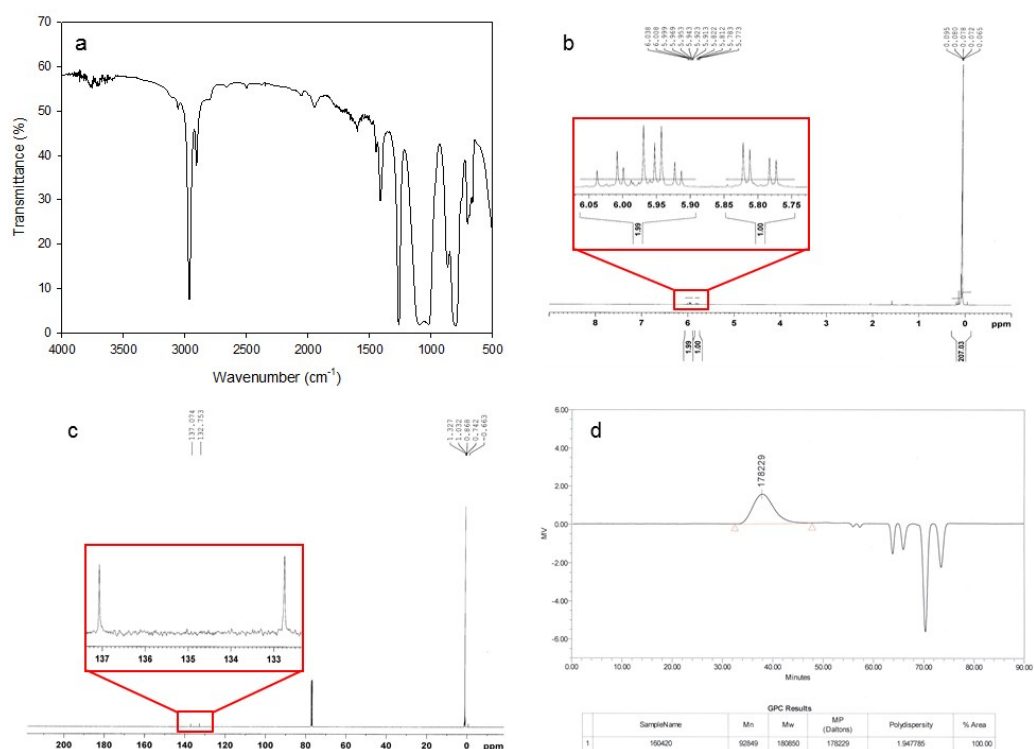

**Fig. S2** IR (a), <sup>1</sup>H NMR (b), <sup>13</sup>C NMR (c) spectra, and GPC (d) results of poly(dimethylsiloxane-*co*-methylvinylsiloxane) (PDMVS) (97:3, mol%) (P03).

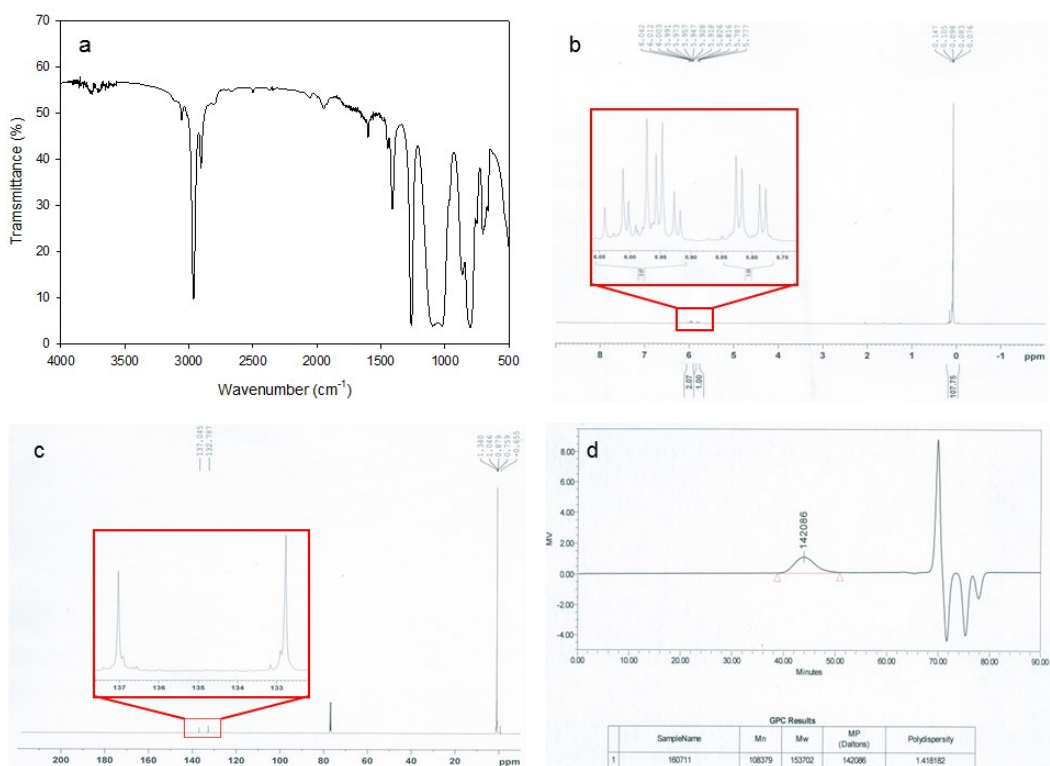

**Fig. S3** IR (a), <sup>1</sup>H NMR (b), <sup>13</sup>C NMR (c) spectra, and GPC (d) results of poly(dimethylsiloxane-co-methylvinylsiloxane) (PDMVS) (94:6, mol%) (P06).

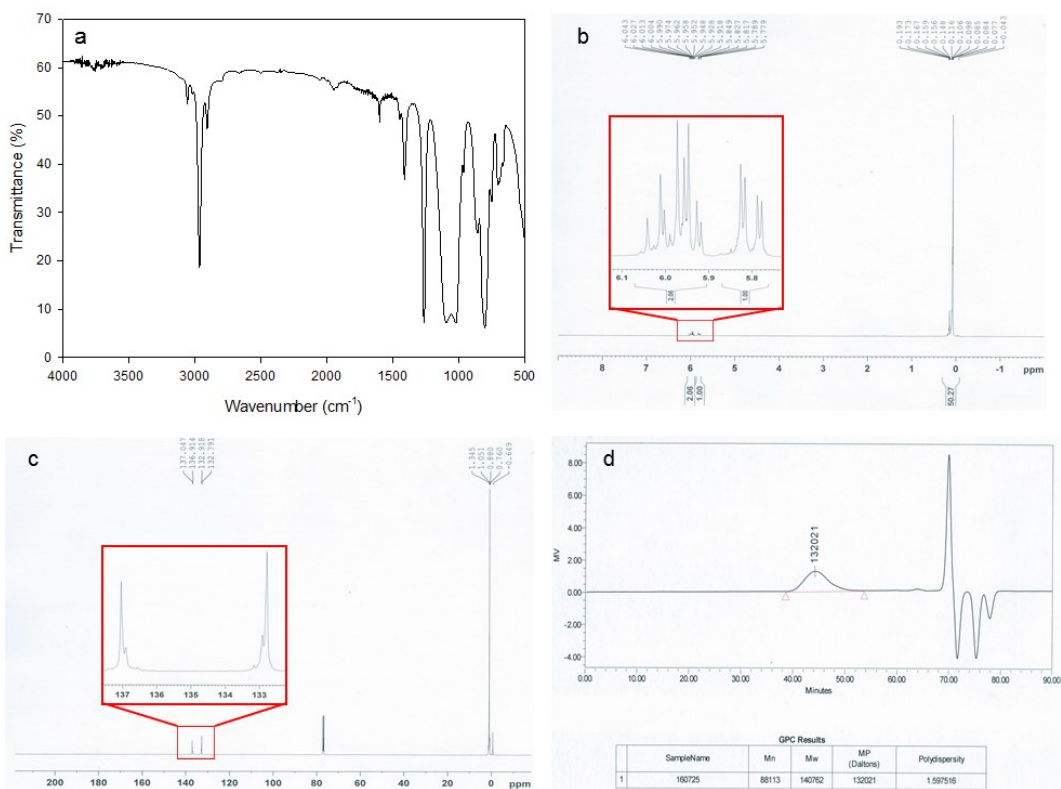

**Fig. S4** IR (a), <sup>1</sup>H NMR (b), <sup>13</sup>C NMR (c) spectra, and GPC (d) results of poly(dimethylsiloxane-co-methylvinylsiloxane) (PDMVS) (88:12, mol%) (P12).

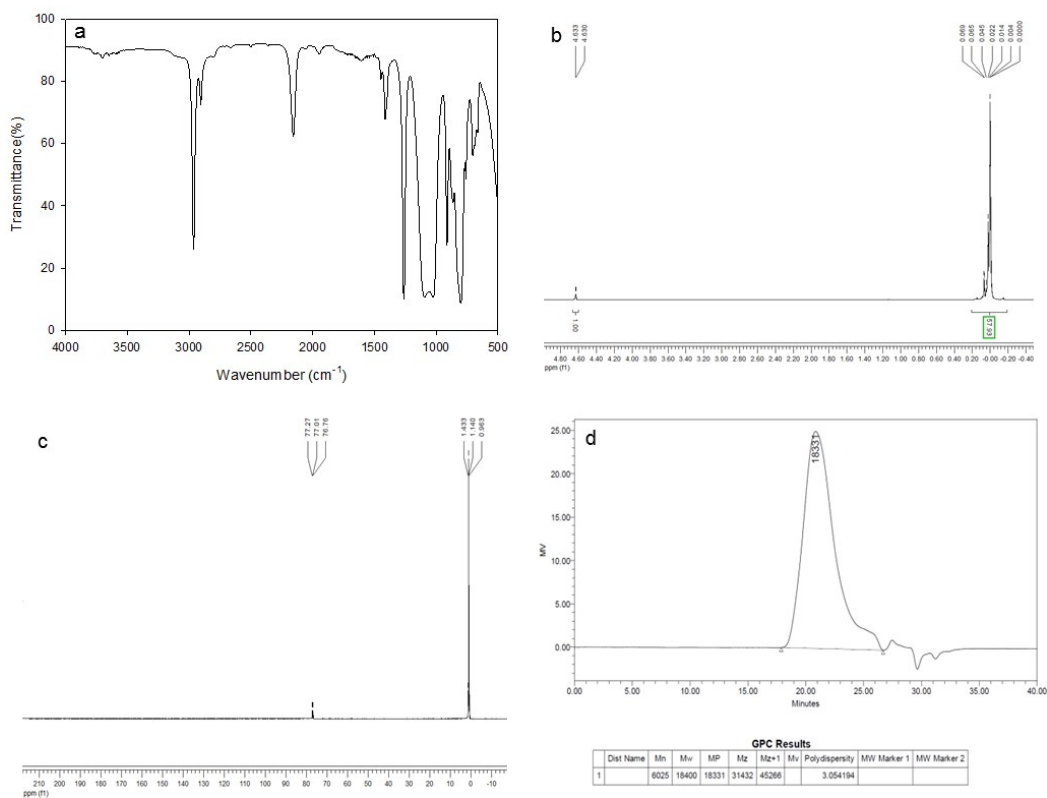

**Fig. S5** IR (a),  $^1\text{H}$  NMR (b),  $^{13}\text{C}$  NMR (c) spectra, and GPC (d) results of poly(dimethylsiloxane-co-methylsiloxane) (PDMMS) (90:10, mol%).

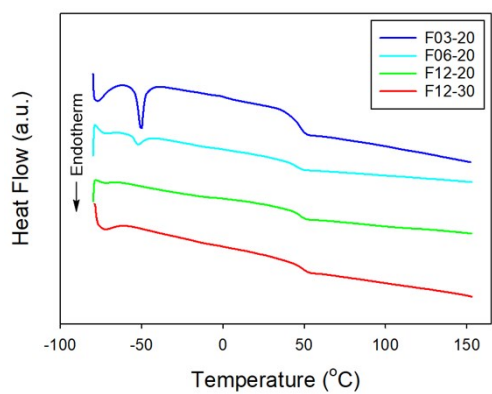

**Fig. S6** DSC thermograms of the UV-cured films on the second heating.

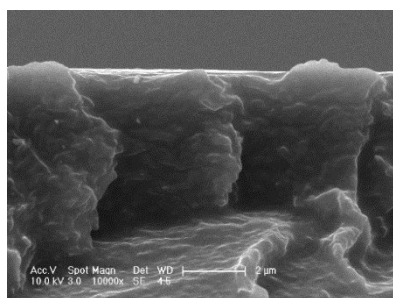

**Fig. S7** A cross-sectional SEM image of the F06-20 film.

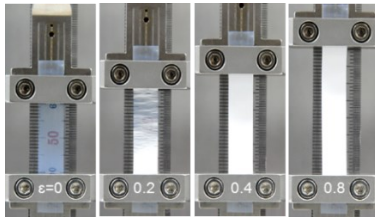

**Fig. S8** Motion capture of the F06-20 film at each strain during drawing.

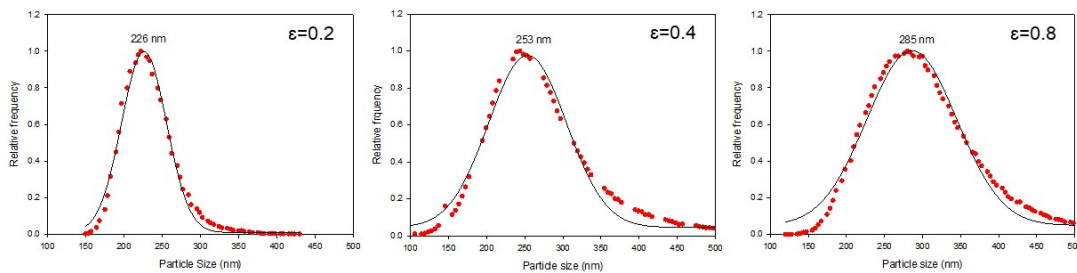

**Fig. S9** A variation in size distribution of the PtBA nanoparticles packed into the F06-20 film with strain.

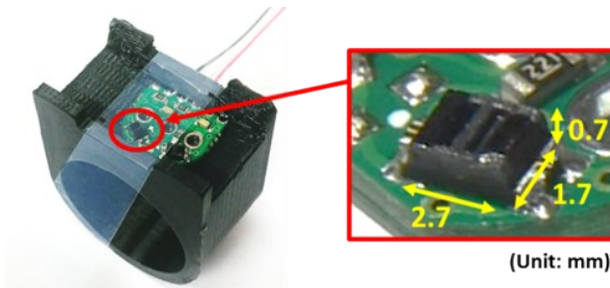

**Fig. S10** A photograph of reflecting-type strain sensor established for human motion monitoring. The perforated frame putting on the index finger is used to facilitate finger movement during sensor performance test. The magnified view shows a detailed structure of optical transceiver module.

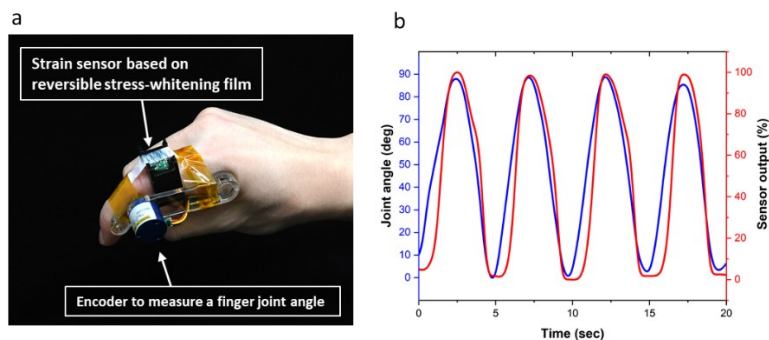

**Fig. S11** A sensor performance test for real-time monitoring change in finger joint angle. An encoder measuring bending angle is mounted on the finger joint with a link system. Time-response of the reflecting-type strain sensor was simultaneously compared to the signal from the encoder.

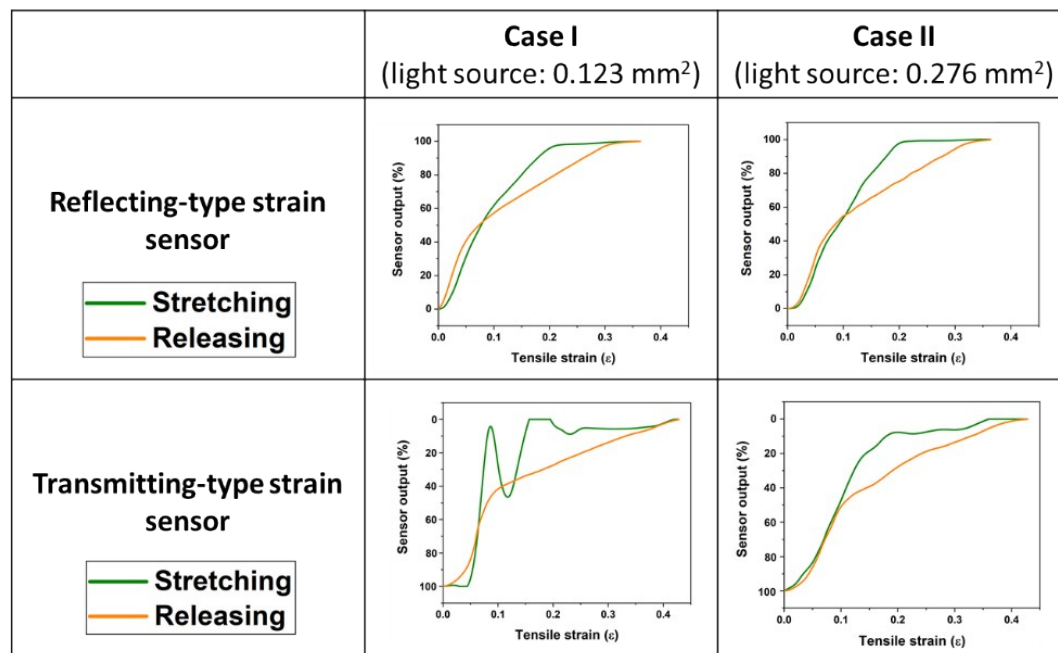

**Fig. S12** The continuous sensor response of transmitting and reflecting-type strain sensor during an elongation-recovery cycle. In the case of the transmitting-type strain sensor with a small light source (case I), unstable sensor output is observed at the initial stage of elongation ( $\epsilon < 10\%$ ) due to an inconsistent position mismatch between a light illuminated spot and streaks irregularly generated at the elastomer film, while the reflecting-type strain sensor exhibits stable response regardless of size of a light source.

## Tables

**Table S1** Calculation of  $\delta$ ,  $\delta_d$ ,  $\delta_p$ , and  $\delta_h$  for *t*BA.

| <i>t</i> BA                                                                                                                                       |                                                                                                | $F_{di}$<br>( $J^{1/2} \cdot cm^{3/2} \cdot mol^{-1}$ ) | $F_{pi}$<br>( $J^{1/2} \cdot cm^{3/2} \cdot mol^{-1}$ ) | $E_{hi}$<br>( $J \cdot mol^{-1}$ ) |
|---------------------------------------------------------------------------------------------------------------------------------------------------|------------------------------------------------------------------------------------------------|---------------------------------------------------------|---------------------------------------------------------|------------------------------------|
| Chemical structure                                                                                                                                | Group contribution                                                                             |                                                         |                                                         |                                    |
| 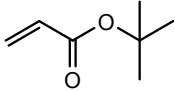<br>$M_w=128.17$<br>$d=0.875 \text{ g/mL at } 25^\circ C^{S1}$ | $-CH_3 \times 3$                                                                               | $420 \times 3$                                          | 0                                                       | 0                                  |
|                                                                                                                                                   | $-COO- \times 1$                                                                               | $390 \times 1$                                          | $490 \times 1$                                          | $7000 \times 1$                    |
|                                                                                                                                                   | $=CH_2 \times 1$                                                                               | $400 \times 1$                                          | 0                                                       | 0                                  |
|                                                                                                                                                   | $=CH- \times 1$                                                                                | $200 \times 1$                                          | 0                                                       | 0                                  |
|                                                                                                                                                   |  $\times 1$ | $-70 \times 1$                                          | 0                                                       | 0                                  |
| Total                                                                                                                                             |                                                                                                | 2180                                                    | 490                                                     | 7000                               |

$$V_{tBA} = 128.17/0.875 = 146.48 \text{ (cm}^3 \cdot \text{mol}^{-1}\text{)}$$

$$\delta_{d,tBA} = \frac{2180}{146.48} = 14.9 \text{ (MPa}^{1/2}\text{)}$$

$$\delta_{p,tBA} = \frac{\sqrt{4902}}{146.48} = 3.35 \text{ (MPa}^{1/2}\text{)}$$

$$\delta_{h,tBA} = \frac{\sqrt{7000}}{146.48} = 6.91 \text{ (MPa}^{1/2}\text{)}$$

$$\delta_{tBA} = \sqrt{14.9^2 + 3.35^2 + 6.91^2} = 16.8 \text{ (MPa}^{1/2}\text{)}$$

**Table S2**  $\Delta\delta$  calculated from the three solubility components,  $\delta_d$ ,  $\delta_p$ , and  $\delta_h$ , of PDMS and *t*BA.

|                                                                                                        | $\delta_d$ (MPa <sup>1/2</sup> ) | $\delta_p$ (MPa <sup>1/2</sup> ) | $\delta_h$ (MPa <sup>1/2</sup> ) | $\delta$ (MPa <sup>1/2</sup> ) | $\Delta\delta$ |
|--------------------------------------------------------------------------------------------------------|----------------------------------|----------------------------------|----------------------------------|--------------------------------|----------------|
| PDMS                                                                                                   | 16.0                             | 0.1                              | 4.7                              | 16.7                           | 4.08           |
| <i>t</i> BA                                                                                            | 14.9                             | 3.35                             | 6.91                             | 16.8                           |                |
| $\Delta\delta$ (PDMS/ <i>t</i> BA) = $\sqrt{(16.0 - 14.9)^2 + (0.1 - 3.35)^2 + (4.7 - 6.91)^2} = 4.08$ |                                  |                                  |                                  |                                |                |

**Table S3** Composition of PDMVS solutions in *t*BA.

| Name of polymer solution | P03 (g) | P06 (g) | P12 (g) | <i>t</i> BA <sup>a)</sup> | Acrylate/Vinyl groups (mole ratio) |
|--------------------------|---------|---------|---------|---------------------------|------------------------------------|
| S03-20                   | 0.5176  |         |         | 2.0796                    | 83.3                               |
| S06-20                   |         | 0.7022  |         | 2.8468                    | 43.0                               |
| S12-20                   |         |         | 0.5208  | 2.0905                    | 20.6                               |
| S12-30                   |         |         | 0.9878  | 2.3090                    | 12.0                               |

<sup>a)</sup>*t*BA contains 0.5 mol% of a photoinitiator.

**Table S4** UV lamp intensity applied on a solution layer.

| Spectra                         | UV-V | UV-A | UV-B | UV-C |
|---------------------------------|------|------|------|------|
| Intensity (mW/cm <sup>2</sup> ) | 7.25 | 8.85 | 0.26 | 0.84 |

UV-V: 395~445 nm; UV-A: 320~390 nm; UV-B: 280~320 nm; UV-C: 250~260 nm (obtained from the manual of the radiometer).

**Table S5** Mechanical properties of the stress-whitening films.<sup>a)</sup>

| Film   | Initial modulus (MPa)      | Maximum stress (MPa) | Yield strain  | Maximum strain |
|--------|----------------------------|----------------------|---------------|----------------|
| F03-20 | 15.67 (1.60) <sup>b)</sup> | 3.49 (0.16)          | 0.103 (0.011) | 1.02 (0.09)    |
| F06-20 | 16.70 (2.28)               | 9.03 (0.53)          | 0.171 (0.003) | 1.29 (0.14)    |
| F12-20 | 34.24 (5.18)               | 12.95 (1.82)         | 0.173 (0.025) | 1.06 (0.20)    |
| F12-30 | 9.24 (0.68)                | 10.29 (0.27)         | 0.492 (0.063) | 2.04 (0.15)    |



a)The properties were obtained from Fig. 2c. b)The values in parentheses mean standard deviation.

## Movies

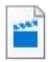

Movie S1.mov

**Movie S1** A video clip taken right after the reversible stress-whitening in a transparent PDMS film was discovered.

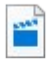

Movie S2.mov

**Movie S2** A video clip showing **the F12-20 film** drawn and recovered back by an Instron machine.

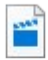

Movie S3.mov

**Movie S3** A video clip showing the application of strain sensor for human motion monitoring.

## Reference

S1. Sigma-Aldrich, Online Product Catalog, <https://www.sigmaaldrich.com/korea.html>, (accessed November 2020).
